# Supplementary material
Source: Springer Nature journal article supplement (https://www.springermedizin.de/resource/supplementary/12943_2010_670_MOESM11_ESM.pdf/9554538)

**NPC****Normal NP****T1****T2****T3****LMP1**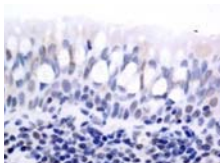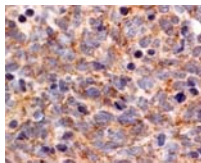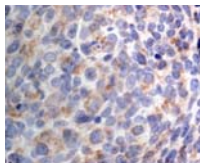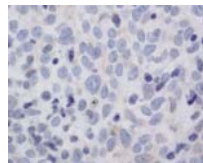**ID1**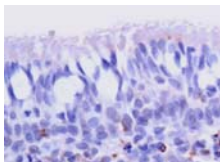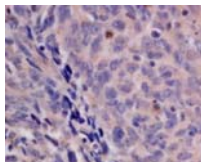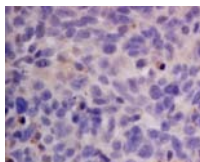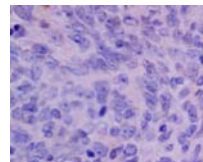**Foxo3a**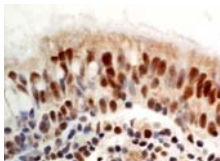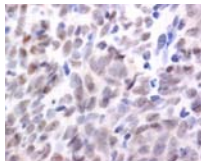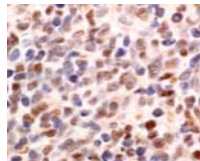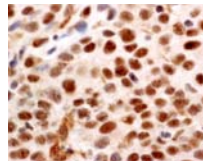

Supplement: MOESM11 [file 9554538]
